# Supplementary material for: Optimization of the electron transport in quantum dot light-emitting diodes by codoping ZnO with gallium (Ga) and magnesium (Mg)
Source: Royal Society of Chemistry journal article supplement (doi:10.1039/c9ra06976c), 2019-01-01
Supplement: c9ra06976c1.pdf [file c9ra06976c1.pdf]

## Supporting Information:

### Optimization of the Electron Transport in Quantum Dot Light-Emitting Diodes by codoping ZnO with Gallium(Ga) and Magnesium(Mg)

Hong Hee Kim,<sup>‡a,b</sup> David O Kumi,<sup>‡c</sup> Kiwoong Kim,<sup>d</sup> Donghee Park,<sup>a</sup> Yeonjin Yi,<sup>d</sup> So Hye Cho,<sup>e</sup> Cheolmin Park,<sup>b</sup> OM Ntwaeaborwa<sup>\*f</sup> and Won Kook Choi<sup>\*a</sup>

a. Center for Opto-Electronic Materials and Devices, Post-Silicon Semiconductor Institute, Korea Institute of Science and Technology (KIST), Seoul 02792, Korea. E-mail: wkchoi@kist.re.kr; Tel: +82-2-958-5562

b. Department of Materials Science and Engineering, Yonsei University, Seoul 03722, Korea.

c. School of Physics, University of the Witwatersrand, Private Bag 3, Wits 2050, South Africa.

d. Physics and Applied Physics, Yonsei University, Seoul 120–749, South Korea.

e. Materials Architecturing Research Center, Korea Institute of Science and Technology (KIST), Seoul 02792, Korea.

f. School of Physics, University of the Witwatersrand, Private Bag 3, Wits 2050, South Africa. E-mail: martin.ntwaeaborwa@wits.ac.za; Tel: +2711 717 6887

<sup>‡</sup> These authors contributed equally.

<sup>\*</sup> Corresponding author: [wkchoi@kist.re.kr](mailto:wkchoi@kist.re.kr); [martin.ntwaeaborwa@wits.ac.za](mailto:martin.ntwaeaborwa@wits.ac.za)

(a)

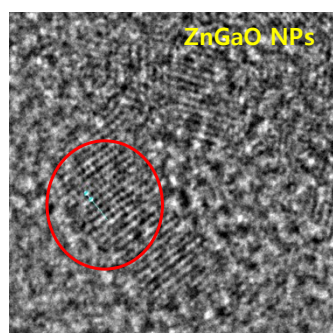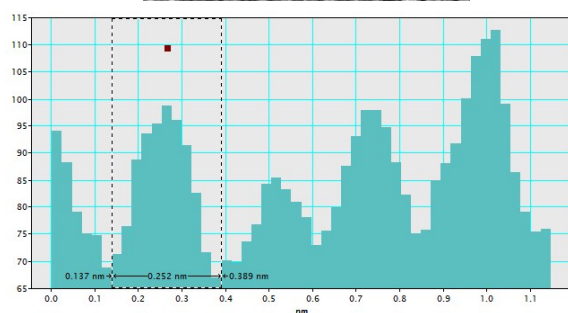

(b)

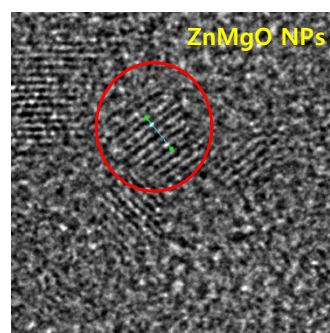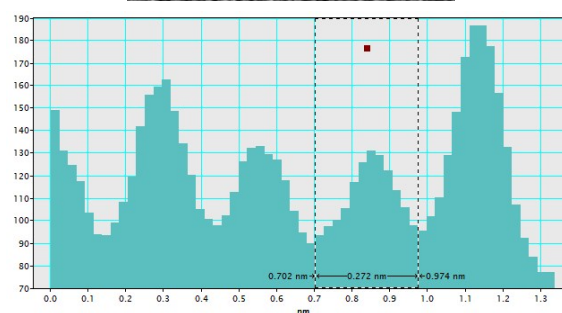

(c)

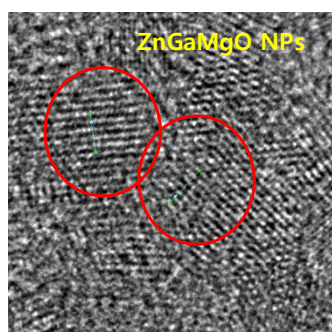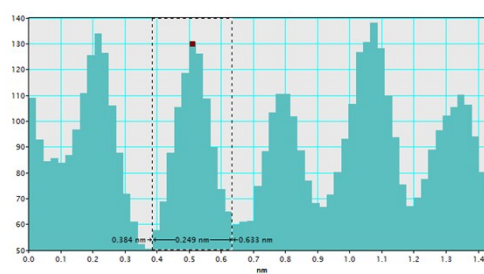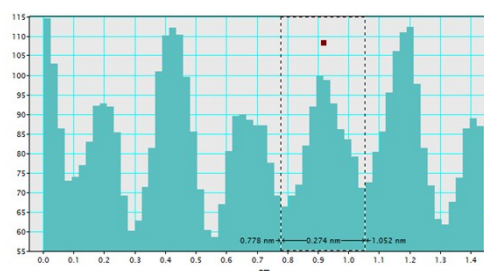

Figure S1. HRTEM images and a line profile on the (a) ZnGaO, (b) ZnMgO, and (c) ZnGaMgO NPs.

**The donor concentration ( $N_D$ ) of four materials is calculated using to BM shift equation:** The Fermi levels of four materials (ZnO, ZnGaO, ZnMgO, and ZnGaMgO NPs) are located about the CBM with energy as high as 0.13-0.46 eV, which indicates that energy levels are degenerate. This degeneration is observed as the bandgap widens in the semiconductor, and the concentration can be determined by the well-known Burstein-Moss shift equation (1).

$$\Delta E_{BM} = E_F - E_{CBM} = \left( \frac{h^2}{8\pi^2 m_{eh}^*} \right) (3\pi^2 n)^{\frac{2}{3}}, \quad (1)$$

where  $m_{eh}^*$ ,  $E_F$ ,  $E_{CBM}$ , and  $n$  are the electron-hole reduced mass (0.19  $m_e$ ), Fermi level, minimum energy of the conduction band, and carrier concentration, respectively. The optical bandgap of 3.50, 3.58, 3.75, and 3.61 eV measured from UV-vis absorption (figure 4(a)), corresponding to  $\Delta E_{BM} = 0.13, 0.26, 0.46$ , and 0.38 eV. Using  $\Delta E_{BM}$ , the donor concentration ( $N_D$ )

| Donor concentration ( $N_D$ )                             |                                       |
|-----------------------------------------------------------|---------------------------------------|
| ZnO                                                       | $1.76 \times 10^{19} \text{ cm}^{-3}$ |
| Zn <sub>0.88</sub> Ga <sub>0.12</sub> O                   | $4.99 \times 10^{19} \text{ cm}^{-3}$ |
| Zn <sub>0.86</sub> Mg <sub>0.14</sub> O                   | $1.17 \times 10^{20} \text{ cm}^{-3}$ |
| Zn <sub>0.87</sub> Ga <sub>0.1</sub> Mg <sub>0.03</sub> O | $8.83 \times 10^{19} \text{ cm}^{-3}$ |

of four materials can be deduced according to equation (1). Calculated values are as below.

**Table 1.** Atomic Concentration (%) of ZnO, ZnGaO, ZnMgO, and ZnGaMgO NPs as measured by XPS and the relative concentration of Ga and Mg elements vs Zn element.

|         | C1s  | O1s  | Mg1s | Zn2p <sup>3</sup> | Ga2p <sup>3</sup> | Total |
|---------|------|------|------|-------------------|-------------------|-------|
| ZnO     | 19.7 | 39.7 | -    | 40.6              | -                 | 100   |
| ZnGaO   | 20.3 | 41.2 | -    | 33.9              | 4.6               | 100   |
| ZnMgO   | 25.6 | 41.9 | 4.7  | 27.8              | -                 | 100   |
| ZnGaMgO | 22.1 | 41.5 | 0.9  | 31.7              | 3.8               | 100   |

  

|         | Mg | Zn | Ga | Total |
|---------|----|----|----|-------|
| ZnGaO   | -  | 88 | 12 | 100   |
| ZnMgO   | 14 | 86 | -  | 100   |
| ZnGaMgO | 3  | 87 | 10 | 100   |

**Table 2.** Energy offsets formed at the interface of QDs/ETLs and ETLs/Al electrode.

|                               | $\Delta G$ (eV)                      |                      |                      |
|-------------------------------|--------------------------------------|----------------------|----------------------|
|                               | $CBM_{ETL}/Al$<br>(Schottky barrier) | $CBM_{ETL}/CBM_{QD}$ | $VBM_{ETL}/VBM_{QD}$ |
| ZnO                           | 1.09                                 | 0.99                 | 0.21                 |
| $Zn_{0.88}Ga_{0.12}O$         | 0.44                                 | 0.34                 | 0.94                 |
| $Zn_{0.87}Ga_{0.1}Mg_{0.03}O$ | 0.41                                 | 0.31                 | 1.00                 |
| $Zn_{0.86}Mg_{0.14}O$         | 0.25                                 | 0.15                 | 1.30                 |
